# Supplementary material
Source: publisher figshare collection journal article supplement (https://tandf.figshare.com/articles/dataset/_/1476246)
Supplement: Supplementary file 1 [file 5]

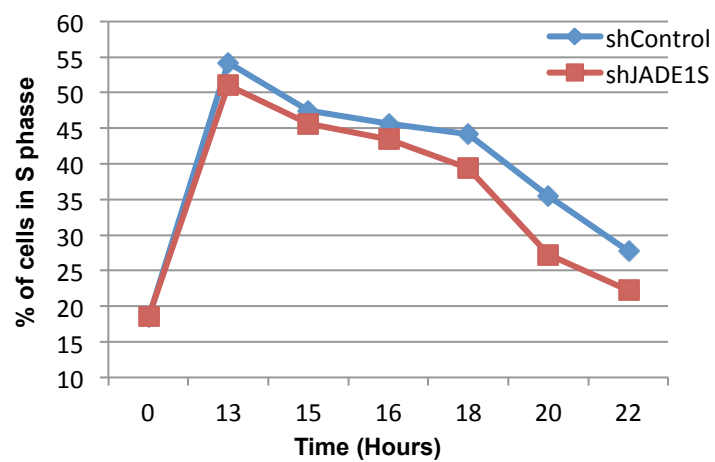

**Figure S1.** Kinetics of S-phase in cells with synchronized cell cycle.

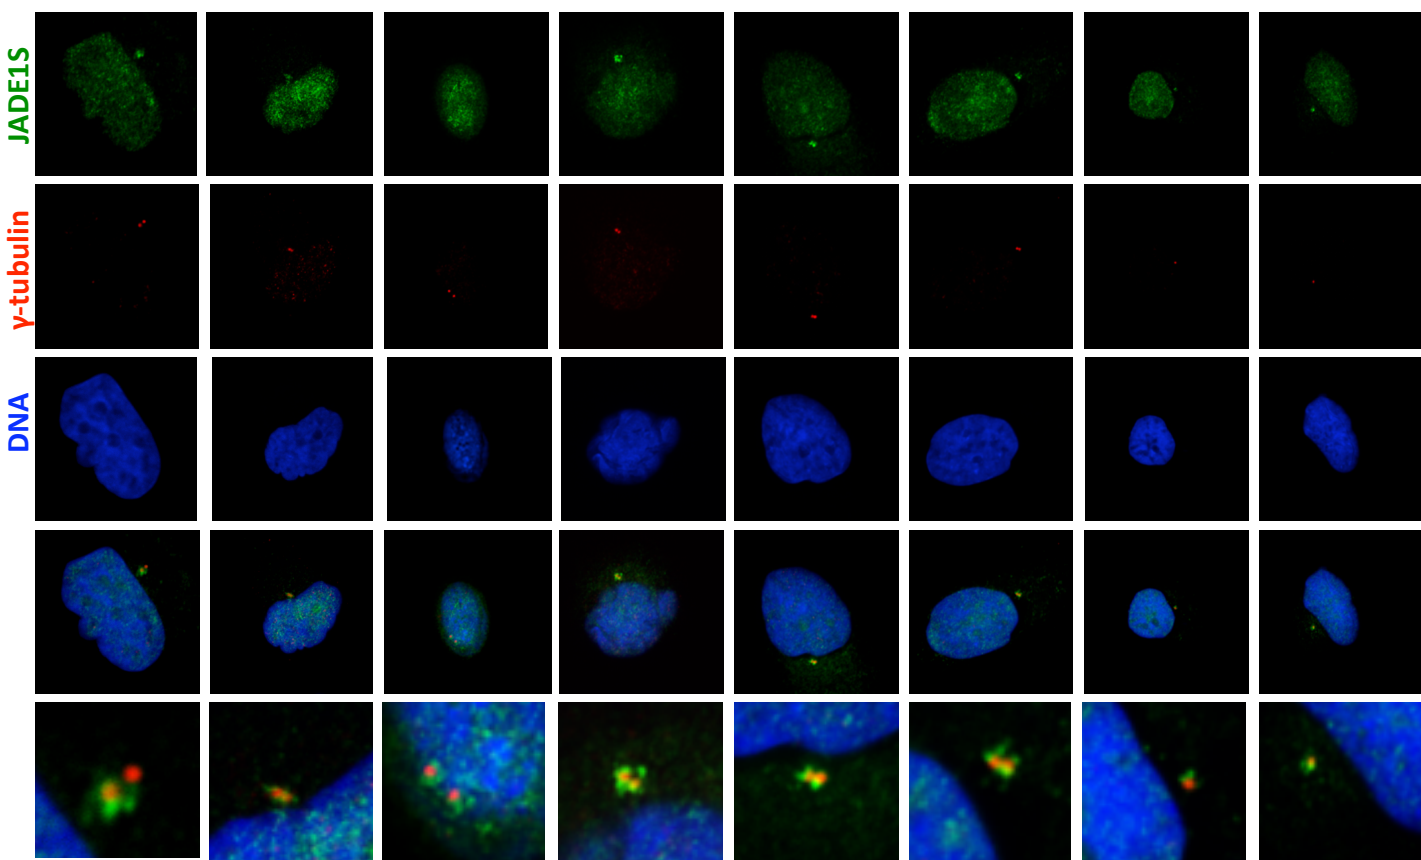

**Figure S2.** JADE1S localizes to the centrosomes in interphase cells.

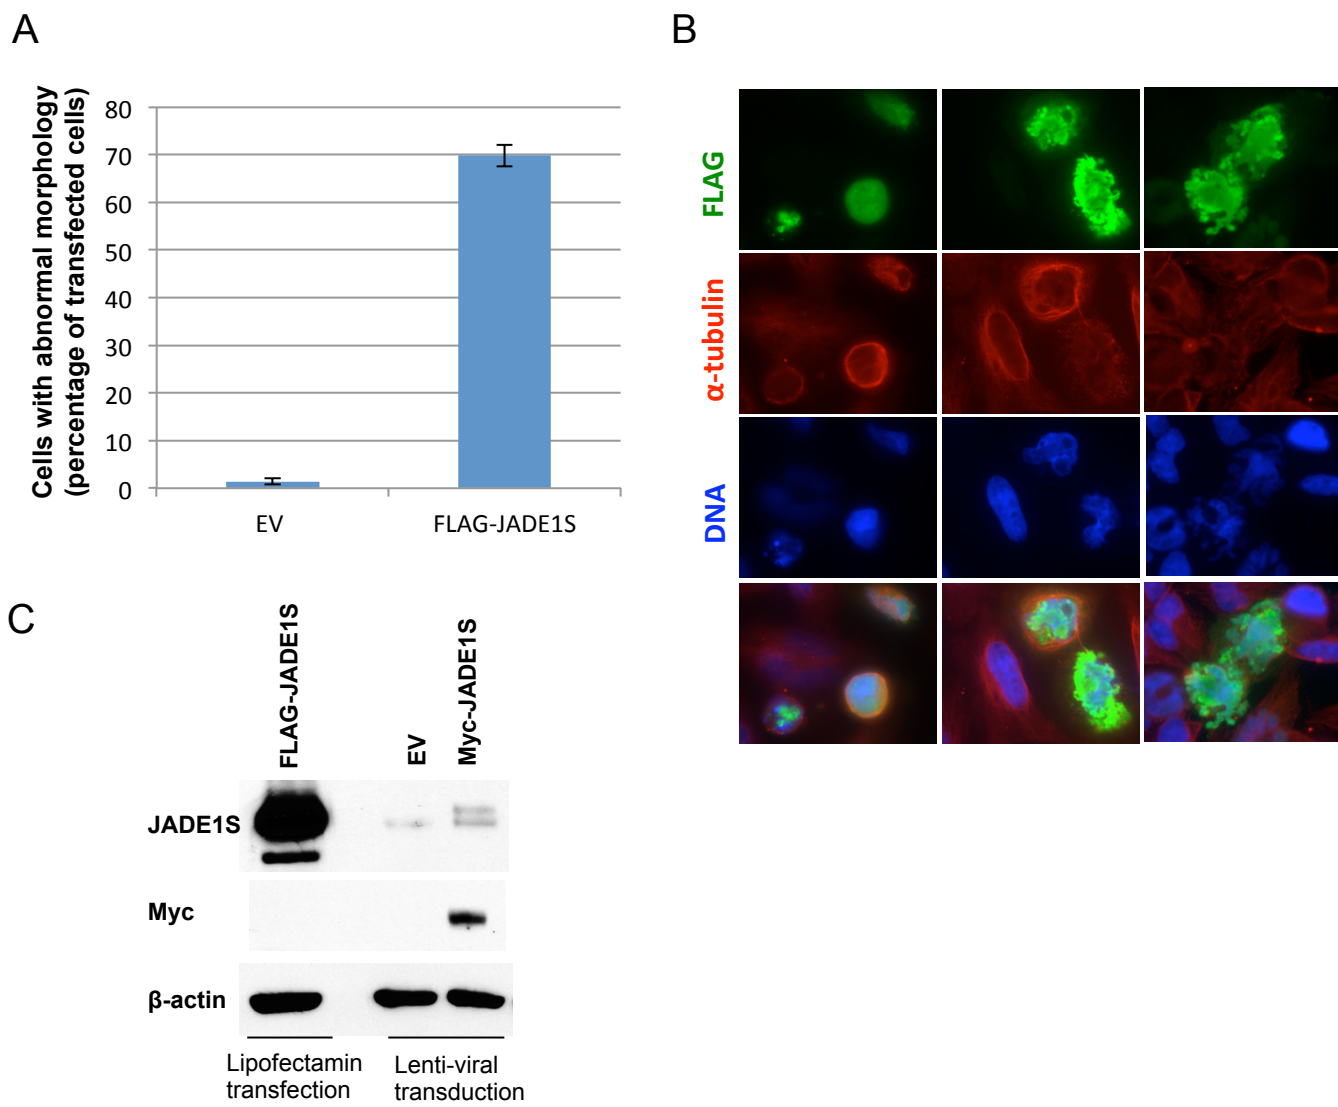

**Figure S3.** Vast over-expression of JADE1S is toxic to the cells.
